# Supplementary material for: Modeling Alexander disease with patient iPSCs reveals cellular and molecular pathology of astrocytes
Source: PubMed Central journal article supplement (PMC4940830; doi:10.1186/s40478-016-0337-0), 2016-07-11

# Supplemental Figure 1

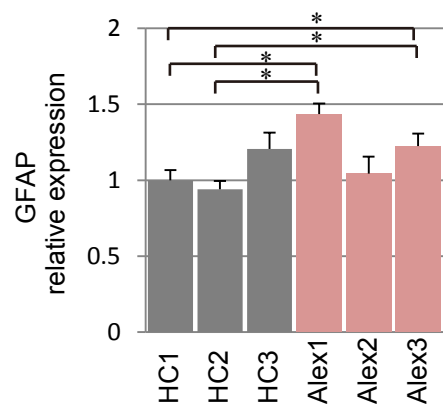

Supplement: 40478_2016_337_MOESM1_ESM.pdf [file 40478_2016_337_MOESM1_ESM.pdf]
