# Supplementary material for: Modeling Alexander disease with patient iPSCs reveals cellular and molecular pathology of astrocytes
Source: Springer Nature journal article supplement (doi:10.1186/s40478-016-0337-0), 2016-07-11

# Supplemental Figure 4

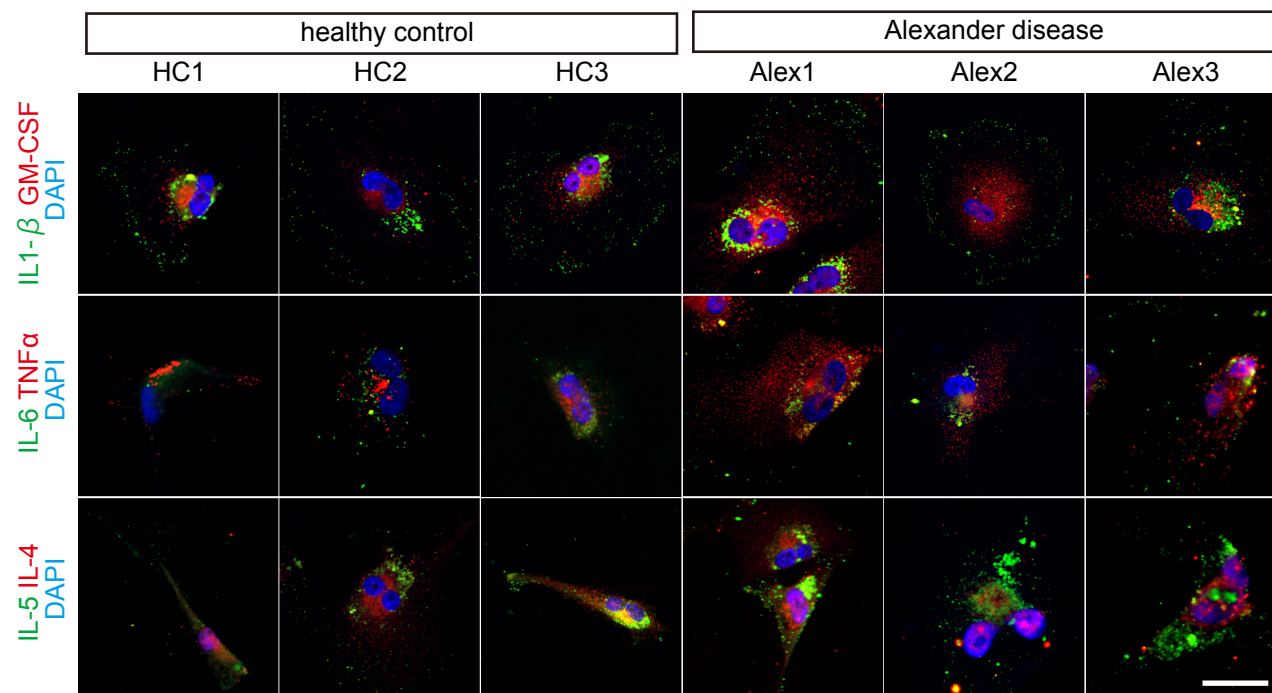

Supplement: MOESM4 [file 25665986]
